# Supplementary material for: Dithiafulvalene functionalized diketopyrrolopyrrole based sensitizers for efficient hydrogen production
Source: Royal Society of Chemistry journal article supplement (doi:10.1039/c5cp01777g), 2015-01-01
Supplement: c5cp01777g1.pdf [file c5cp01777g1.pdf]

## Supporting information

### Dithiafulvalene Functionalized Diketopyrrolopyrrole Based Sensitizers for Efficient Hydrogen Production

K. Narayanaswamy, Amritanjali Tiwari, Indranil Mondal, Ujjwal Pal, S. Niveditha, K. Bhanuprakash, Surya Prakash Singh

#### Experimental section

**Synthesis of 5',5''-(2,5-bis(2-ethylhexyl)-3,6-dioxo-2,3,5,6-tetrahydropyrrolo[3,4-c]pyrrole-1,4-diyl)bis[(2,2'-bithiophene)-5-carbaldehyde] (2).**

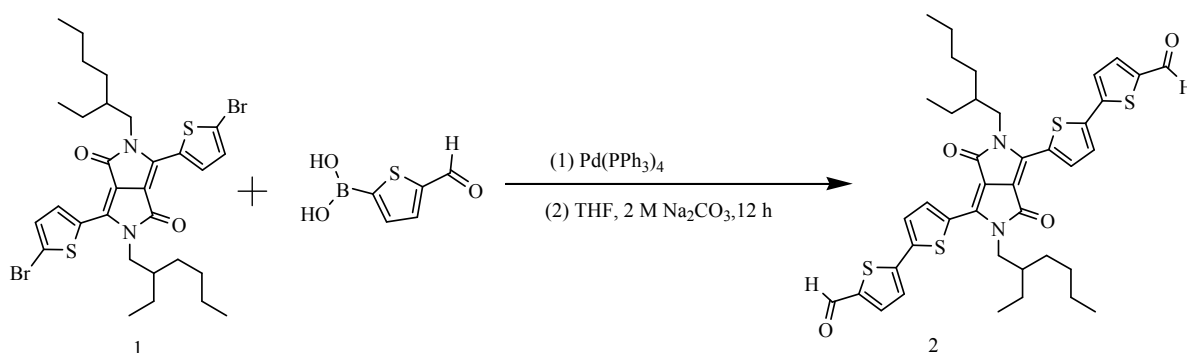

**Synthesis of 5'-(4-(5'((4,5-bis(hexylthio)-1,3-dithiol-2-ylidene)methyl)-[2,2'-bithiophen]-5-yl)-2,5-bis(2-ethylhexyl)-3,6-dioxo-2,3,5,6-tetrahydropyrrolo[3,4-c]pyrrol-1-yl)-[2,2'-bithiophen]-5-carbaldehyde:**

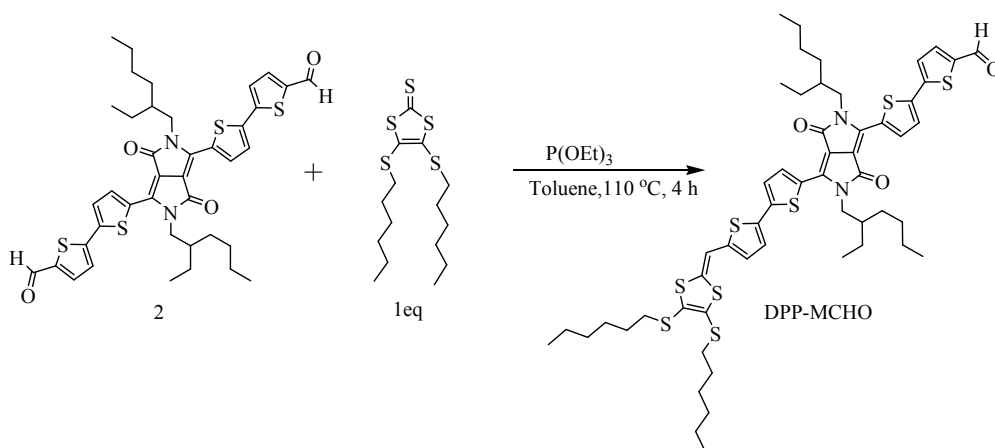

**Synthesis of 2-((5'-(4-(5'-((4,5-bis(hexylthio)-1,3-dithiol-2-ylidene)methyl)-[2,2'-bithiophen]-5-yl)-2,5-bis(2-ethylhexyl)-3,6-dioxo-2,3,5,6-tetrahydropyrrolo[3,4-c]pyrrol-1-yl)-[2,2'-bithiophen]-5-yl)methylene)malononitrile. (DPP-CN)**

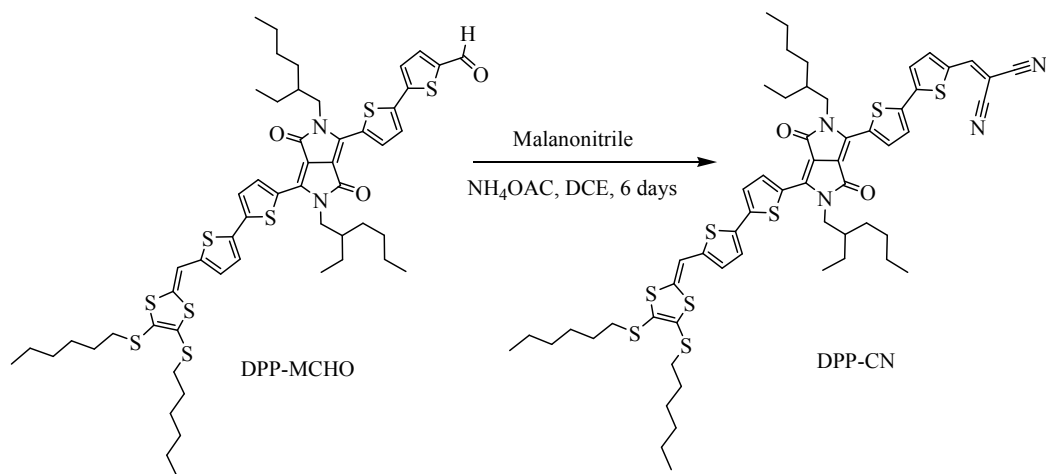

**Synthesis of (Z)-3-(5'-(4-(5'-((4,5-bis(hexylthio)-1,3-dithiol-2-ylidene)methyl)-[2,2'-bithiophen]-5-yl)-2,5-bis(2-ethylhexyl)-3,6-dioxo-2,3,5,6-tetrahydropyrrolo[3,4-c]pyrrol-1-yl)-[2,2'-bithiophen]-5-yl)-2-cyanoacrylic acid (DPP-CA)**

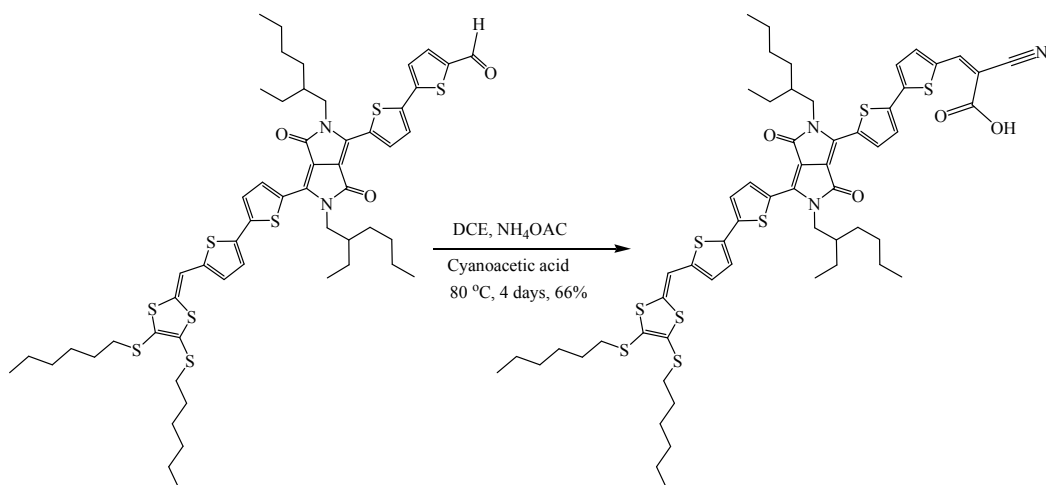

NMR spectra of 2:

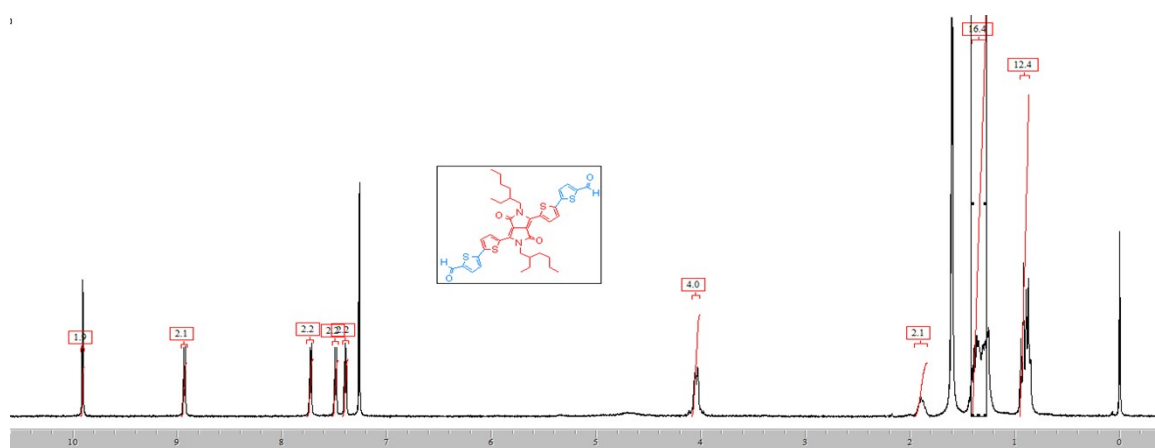

Mass spectra of 2

K N SWAMY , MLK-1

Data: KNS0005.412[c] 23 Jan 2014 16:06 Cal: NPR28DEC 28 Dec 2012 14:44  
Shimadzu Biotech Axima Performance 2.9.3.20110624: Mode Linear, Power: 67, Blanked, P.Ext. @ 1200 (bin 51)  
%Int. 1389 mV[sum= 9720 mV] Profiles 1-7 Smooth Gauss 5

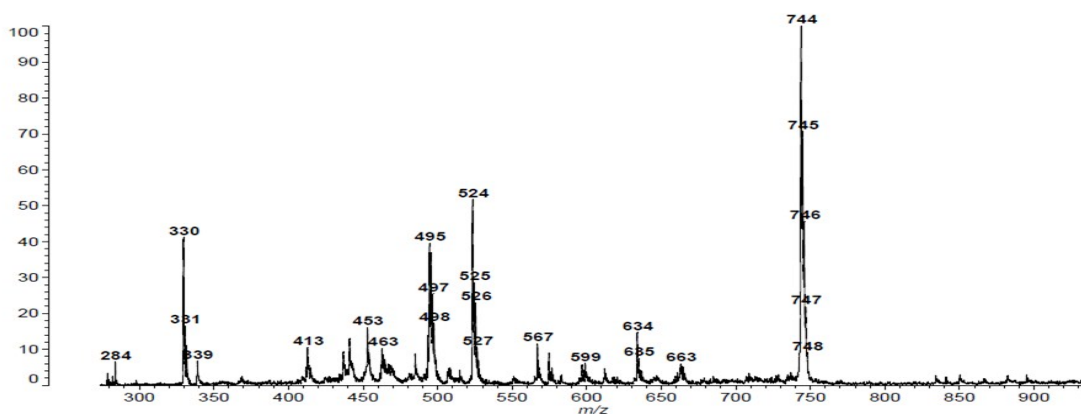

NMR spectra of DPP-MCHO;

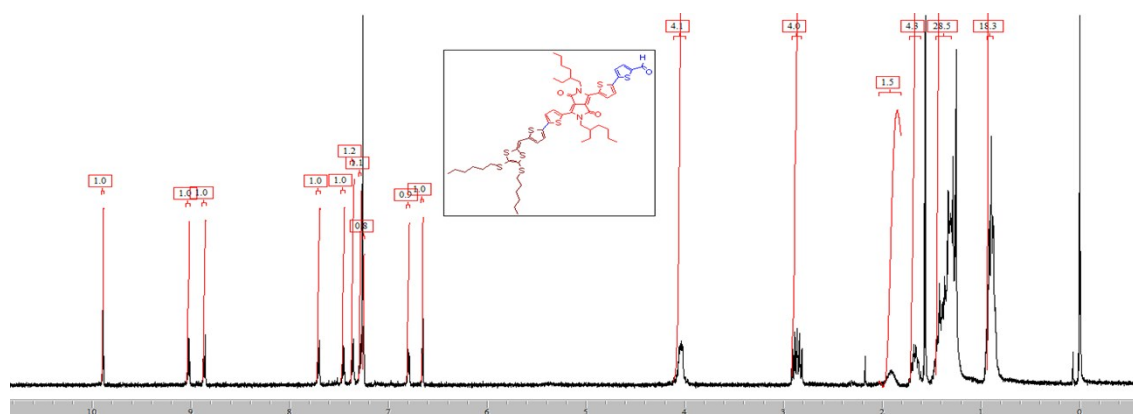

Mass spectra of DPP-MCHO

: N SWAMY , MLK-2

ata: KNS0006.413[c] 23 Jan 2014 16:09 Cal: NPR28DEC 28 Dec 2012 14:44  
himadzu Biotech Axima Performance 2.9.3.20 110624: Mode Linear, Power: 60, Blanked, P.Ext. @ 1200 (bin 51)  
%Int. 913 mV[sum= 8214 mV] Profiles 1-9 Smooth Gauss 5

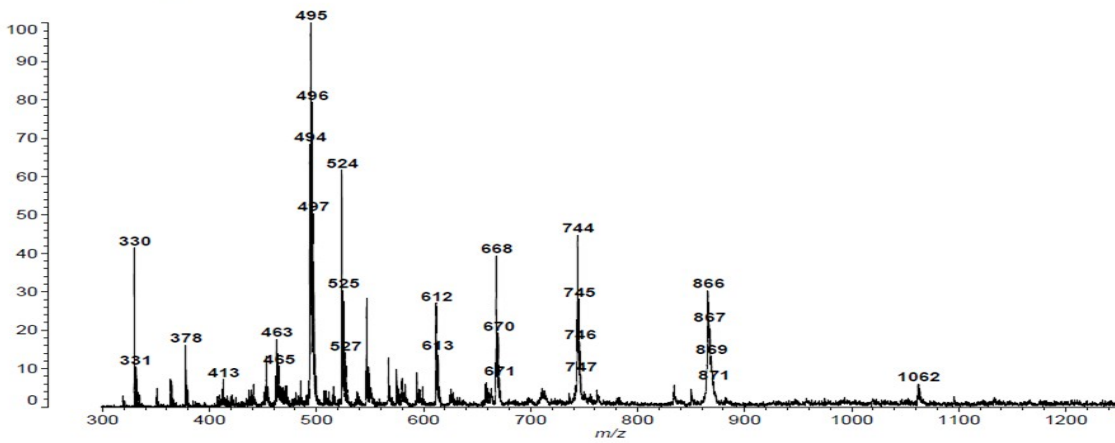

NMR spectra of DPP-CN:

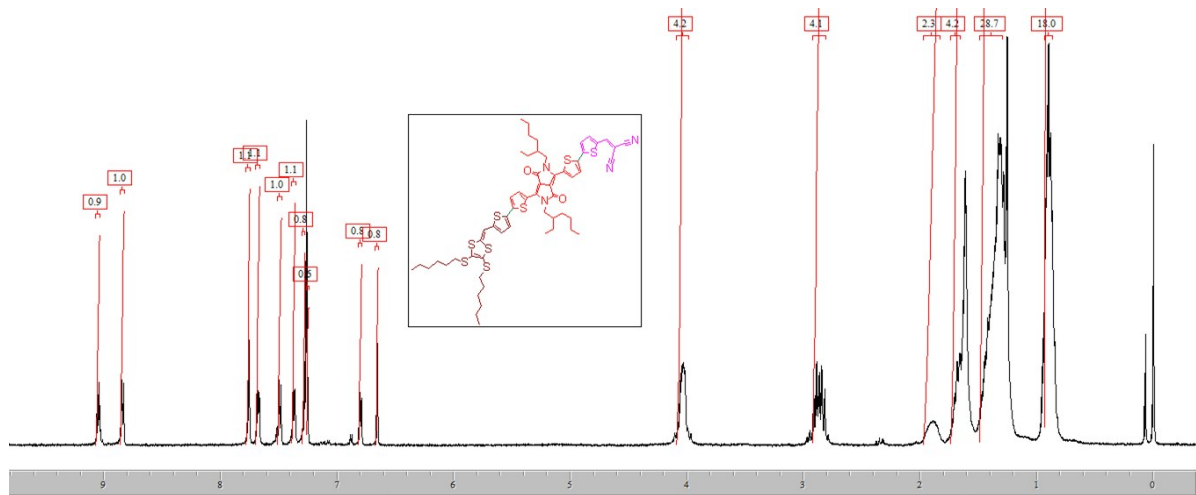

HRMS spectra of DPP-CN

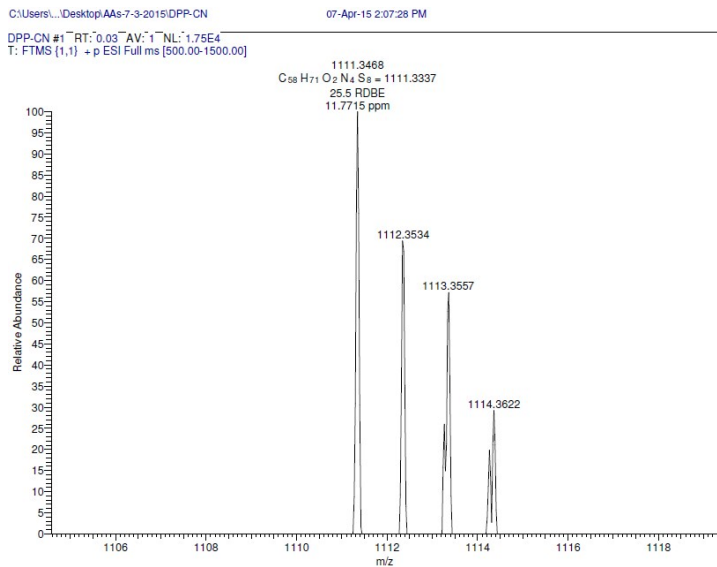

# HRMS spectra of DPP-CA;

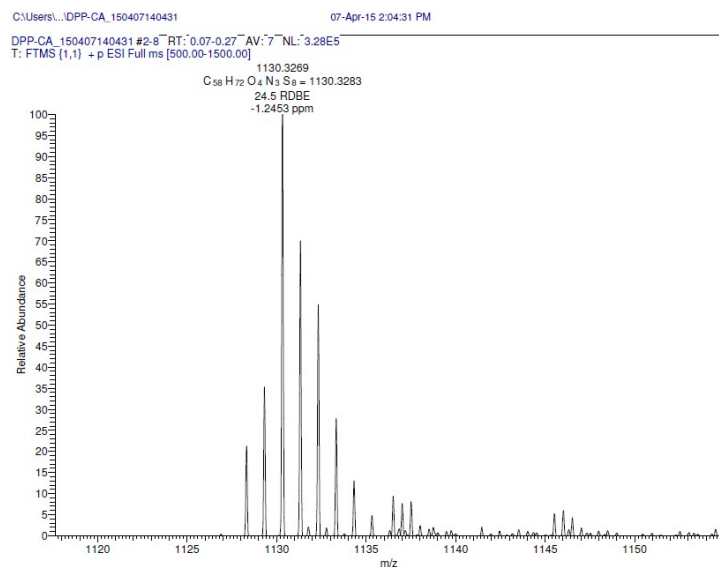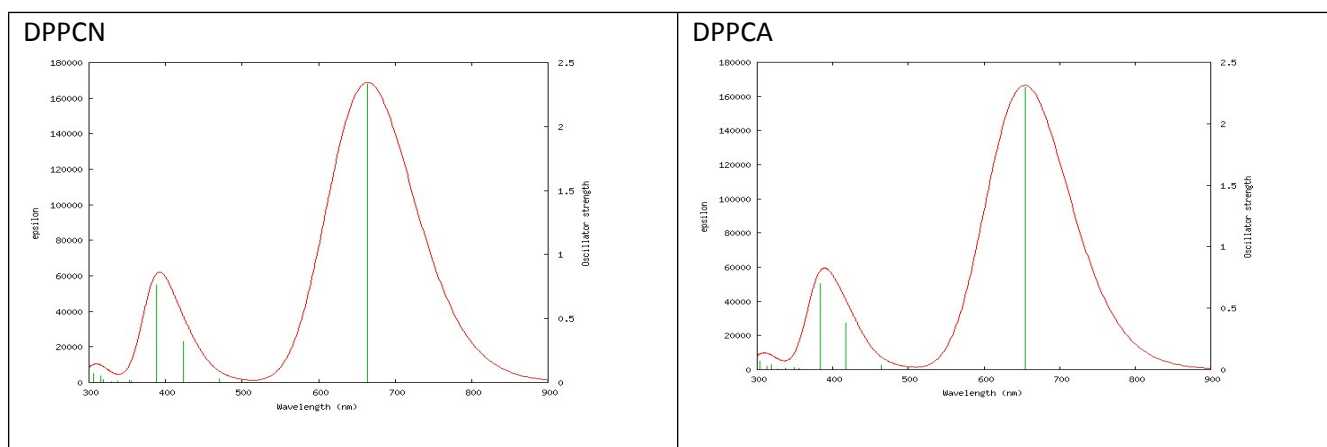

Figure S1. Simulated absorption spectra of DPPCA and DPPCN in DMF solvent.

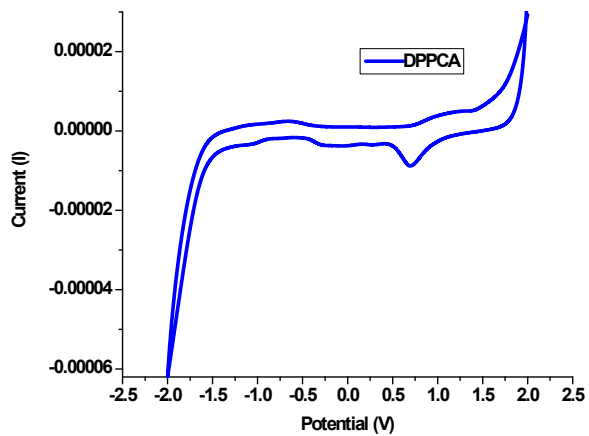

Figure S2. Cyclic voltammetry of DPP-CA recorded in dichloromethane.

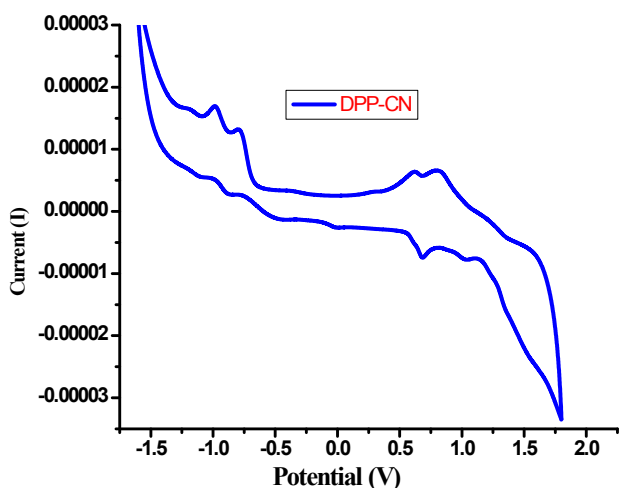

**Figure S3.** Cyclic voltammetry of DPP-CN recorded in dichloromethane

**Table. S1** Absorption spectra simulated at CAM-B3YP/6-311+G (d, p) level of theory in DMF solvent.

| Dye   | Excited state | $\lambda_{\text{max}}$ (nm) | Osc. Strength ( <i>f</i> ) | Major contribution                                                 |
|-------|---------------|-----------------------------|----------------------------|--------------------------------------------------------------------|
| DPPCA | S1            | 654                         | 2.297                      | H-1->LUMO (11%), HOMO->LUMO (74%), HOMO->L+1 (10%)                 |
|       | S3            | 417                         | 0.379                      | H-1->LUMO (19%), H-1->L+1 (33%), HOMO->L+1 (24%)                   |
|       | S4            | 383                         | 0.700                      | H-2->LUMO (48%), HOMO->L+2 (17%)                                   |
|       | S9            | 318                         | 0.042                      | H-1->L+3 (24%), HOMO->L+3 (31%), HOMO->L+4 (10%)                   |
|       | S11           | 304                         | 0.070                      | H-10->LUMO (10%), H-3->LUMO (24%), H-3->L+1 (16%), H-2->L+1 (10%)  |
| DPPCN | S1            | 664                         | 2.328                      | H-1->LUMO (11%), HOMO->LUMO (72%), HOMO->L+1 (11%)                 |
|       | S3            | 422                         | 0.322                      | H-1->LUMO (21%), H-1->L+1 (34%), HOMO->LUMO (11%), HOMO->L+1 (22%) |
|       | S4            | 388                         | 0.761                      | H-2->LUMO (51%), HOMO->L+2 (16%)                                   |
|       | S10           | 315                         | 0.051                      | HOMO->L+4 (20%)                                                    |
|       | S11           | 305                         | 0.071                      | H-10->LUMO (11%), H-3->LUMO (22%), H-3->L+1 (16%), H-2->L+1 (10%)  |
